# Supplementary figures and images for: An NMDA receptor-dependent mechanism for subcellular segregation of sensory inputs in the tadpole optic tectum
Source: eLife journal article supplement (doi:10.7554/elife.20502), 2016-11-23

Figure 2 - figure supplement 1

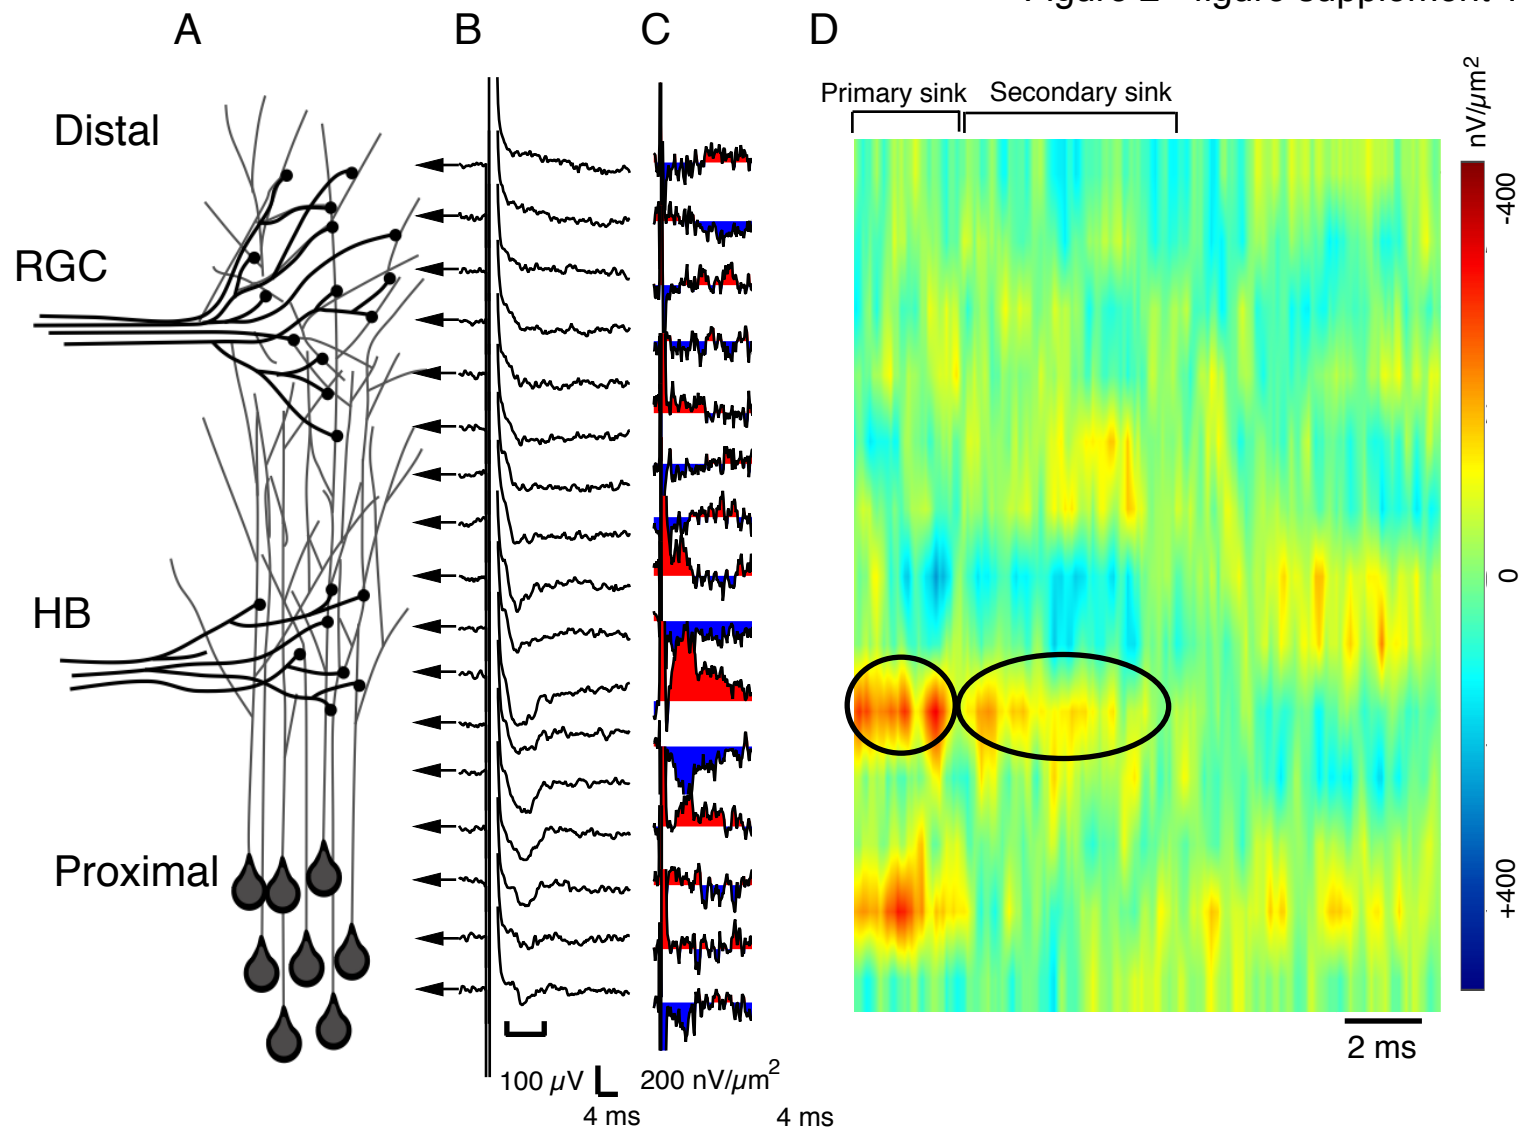

Supplement: supp [file elife-20502-supp-v1.zip]
